# Supplementary material for: Genetic Analysis of Torque Teno Canis Virus Identified in Republic of Korea
Source: MDPI journal article supplement (doi:10.3390/vetsci9120693), 2022-12-13
Supplement: s1 [file s1]

Figure S1. Phylogenetic tree generated using the partial sequences of TTCaV amplified by primer set 1 and the reference strains. The 13 TTCaV-positive samples identified in this study are marked with closed triangles

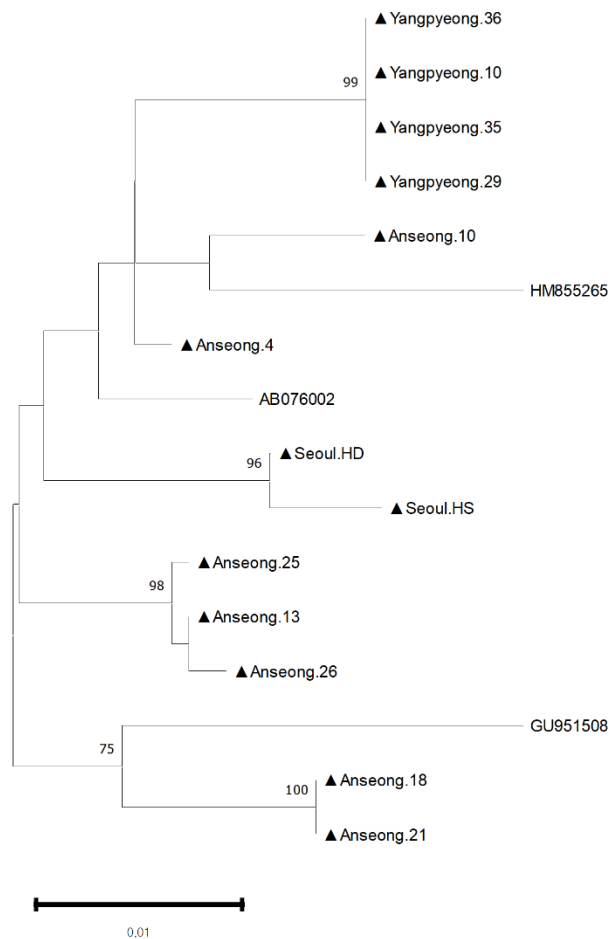

**Table S1. Recombination region identified in MZ503912**

| Recombinant | Parental virus |          | Breakpoints <sup>a</sup> |     | Score for the seven detection methods in RDP4 <sup>b</sup> |                          |                          |                         |                         |                         |                         |
|-------------|----------------|----------|--------------------------|-----|------------------------------------------------------------|--------------------------|--------------------------|-------------------------|-------------------------|-------------------------|-------------------------|
| Virus       | Major          | Minor    | Begin                    | End | RDP                                                        | GENECONV                 | BootScan                 | MaxChi                  | Chimaera                | SiScan                  | 3Seq                    |
| MZ503912    | KX827768       | MZ503910 | 40                       | 985 | 1.3 x 10 <sup>-224</sup>                                   | 1.1 x 10 <sup>-226</sup> | 5.5 x 10 <sup>-223</sup> | 1.2 x 10 <sup>-60</sup> | 3.6 x 10 <sup>-42</sup> | 4.8 x 10 <sup>-83</sup> | 6.3 x 10 <sup>-14</sup> |

<sup>a</sup>The breakpoints are based on the locations in the genome of MZ503912.

<sup>b</sup>The *p* value cut-off was 0.05. *p* < 0.05 indicated that the recombination events were significant.
